# Supplementary material for: Changes in the hierarchical protein polymer structure: urea and temperature effects on wheat gluten films
Source: Royal Society of Chemistry journal article supplement (doi:10.1039/c2ra21812g), 2012-01-01

### Supplementary Information

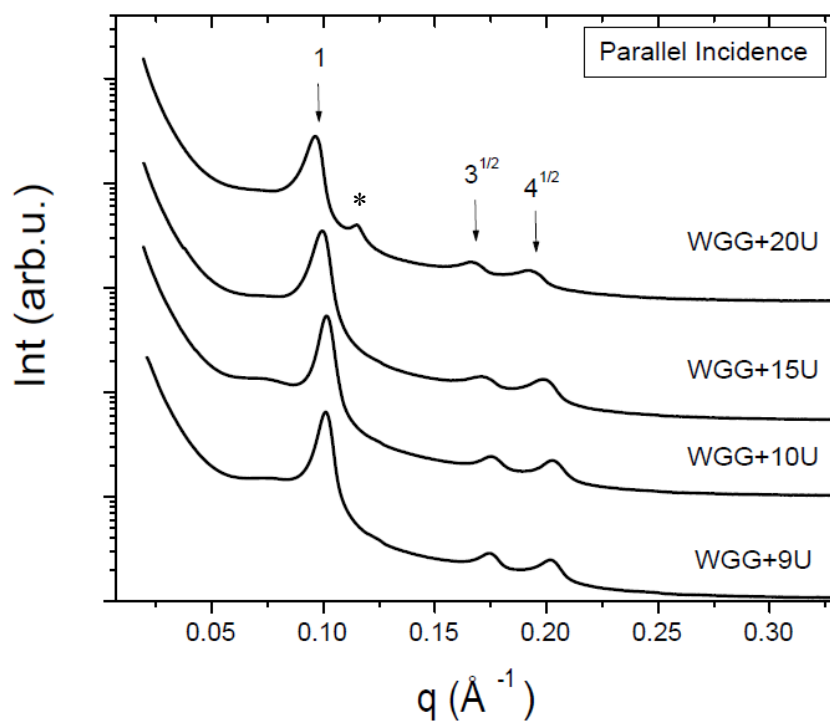

**Fig. S1.** SAXS curves of WGG+9U, WGG+10U, WGG+15U and WGG+20U films with the X-ray beam parallel to the film plane.

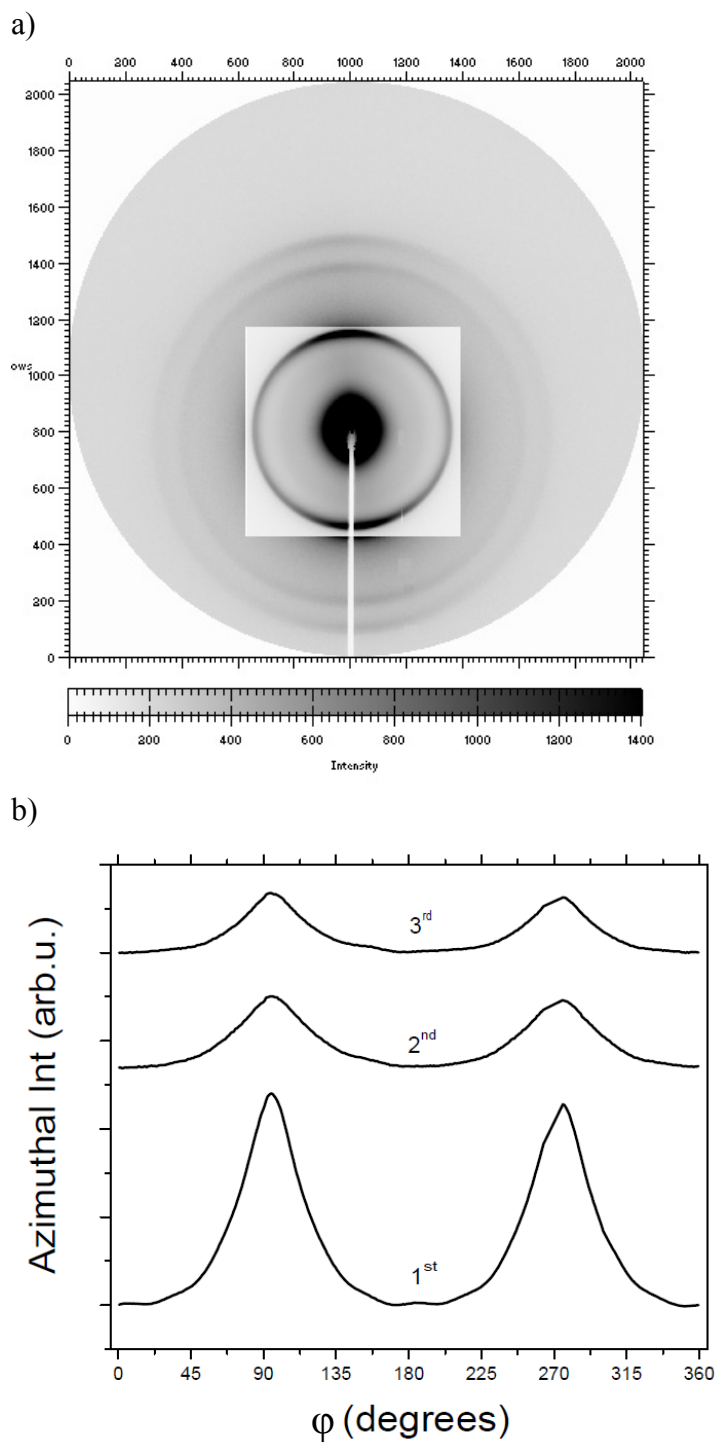

Supplement: c2ra21812g.pdf [file c2ra21812g.pdf]
